1 Multiple factors influence population sex ratios in the Mojave Desert moss *Syntrichia*  
2 *caninervis*<sup>1</sup>

3  
4 Jenna T. Baughman<sup>2,4</sup>, Adam C. Payton<sup>3</sup>, Amber E. Paasch<sup>2</sup>, Kirsten M. Fisher<sup>2</sup>, and  
5 Stuart F. McDaniel<sup>3</sup>

6  
7 <sup>2</sup>Department of Biological Sciences, California State University, 5151 State University  
8 Drive, Los Angeles, CA 90032, USA, <sup>3</sup>Department of Biology, University of Florida, 876  
9 Newell Drive, Gainesville, FL 32611, USA

10  
11 <sup>4</sup>Author for correspondence: Department of Integrative Biology and University and  
12 Jepson Herbaria, University of California, 3040 Valley Life Sciences Building, Berkeley,  
13 CA 94720, USA; e-mail: [jbaughman@berkeley.edu](mailto:jbaughman@berkeley.edu); phone: 219-393-0179.

14  
15 Female biased *Syntrichia caninervis* genetic sex ratio

16  
17  
18  
19  
20  
21  
22  
23

<sup>1</sup>Manuscript received \_\_\_\_\_; revision accepted \_\_\_\_\_.

## Acknowledgements

This work was supported by the California State University Department of Biological Sciences Faculty-Student Achievement Fund to KMF, a Research Exchange Grant to JTB from the NSF EDEN RCN (IOS 0955517), the NSF Louis Stokes Alliances for Minority Participation (HRD 1363399) to AEP, the NIH-NIGMS Minority Biomedical Research Support-Research Initiative for Scientific Enhancement program (GM61331) to JTB, and an NSF grant (DEB 1541005) to SFM.

## ABSTRACT

- *Premise of research:* Natural populations of many mosses appear highly female-biased based on the presence of reproductive structures. This bias could be caused by increased male mortality, lower male growth rate, or a higher threshold for achieving sexual maturity in males. Here we test these hypotheses using samples from two populations of the Mojave Desert moss *Syntrichia caninervis*.
- *Methods:* We used double digest restriction-site associated DNA (RAD) sequencing to identify candidate sex-associated loci in panel of sex-expressing plants. Next, we used putative sex-associated markers to identify the sex of individuals without sex structures.
- *Key results:* We found an 18:1 phenotypic female:male sex ratio in the higher elevation, moister site, and no sex expression at the drier, low elevation site. In contrast, based on genetic data we found a 2:1 female bias in the low stress site and only females in the high stress site. The area occupied by male and female genets was indistinguishable.
- *Conclusions:* These data suggest that both differential mortality and sexual dimorphism in thresholds for sex expression contribute to population sex ratio biases, and that sex-specific life history and survival interact with environmental stress to determine the frequency of sexual reproduction in *S. caninervis*.

Key words: bryophyte; Mojave Desert; moss; Pottiaceae; reproductive strategy; sex expression; sex ratio; *Syntrichia caninervis*

## INTRODUCTION

Female biased sex ratios are a common yet unexplained phenomenon in bryophyte populations (Bisang and Hedenäs, 2005). Most of the female biases documented in mosses to date have been based on counting the number of sexually mature male and female ramets in a population (but see McLetchie et al., 2001; Korpelainen et al., 2008; Bisang et al., 2010; Hedenäs et al., 2010; Bisang and Hedenäs, 2013; Bisang et al., 2014; Bisang et al., 2015; Hedenäs et al., 2016). In dioicous bryophytes, sex determination happens at meiosis with the production of spores (Bachtrog et al., 2011). A spore carrying the female sex-determining locus (U) will form a gametophyte that produces archegonia and ultimately bears the offspring embryo (a sporophyte). Spores with the male sex-determining locus (V) form a gametophyte that produces antheridia. Because the diploid sporophyte is produced by the union of a U-bearing egg with a V-bearing sperm, the sporophyte is always heterozygous at the sex-determining locus. As a consequence of meiotic segregation, therefore, the null expectation is a 1:1 sex ratio. Identifying the underlying mechanisms that generate the persistently female-biased phenotypic sex ratios in moss populations is an essential first step toward understanding the evolutionary causes and consequences of sex ratio bias in this ecologically important group of plants.

A female bias in the production of sexually mature ramets in a natural population could be caused by at least three distinct processes. First, an apparently female biased population sex ratio could simply be a product of faster female growth, as has been found in several species (Shaw and Beer, 1999; Stark et al., 2005a; McDaniel et al., 2008). In this case, female genotypes on average would produce more ramets and occupy larger

areas than male genotypes. Second, males might exhibit a lower frequency of sex expression than females. If this were true, males would constitute a disproportionately large fraction of the sterile plants in a population (termed 'the shy male hypothesis'; Mishler and Oliver, 1991; Stark et al., 2005a). Finally, a female bias could be caused by elevated male mortality during spore production (McDaniel et al., 2007; Norrell et al., 2014), establishment, or at some later point in the life-cycle. Regardless of the proximate cause, elevated male mortality would decrease the amount of genetic diversity in males relative to females.

One of the most extreme cases of sex ratio variation in mosses is in Mojave Desert populations of *Syntrichia caninervis*. Previous data indicate that the phenotypic sex ratio in *S. caninervis* populations ranges from 7:1 (Paasch et al., 2015) to 14 F:1 M (Bowker et al., 2000; Bisang and Hedenäs, 2005), and that some populations lack male sex expression entirely (Stark et al., 2001). Mojave Desert *S. caninervis* is extremely desiccation tolerant and spends much of its life in an air-dried state, limiting all biological functions to infrequent post-rainfall periods, primarily in cool winter months (Stark, 1997; Stark et al., 1998). Environmental variation that corresponds with changes in timing and duration of this biologically active period appears to affect overall levels of sex expression in a population. A survey of 890 *S. caninervis* individuals from a 10 hectare elevation gradient (Bowker et al., 2000) found that total percentage of expressing individuals increased with elevation, and that male sex expression occurred only at the higher elevations, while lower elevation populations contained only a few expressing females. In parallel with low levels of sex expression, sexual fertilization and production

of sporophytes is relatively rare, and established desert *S. caninervis* populations seem to persist through vegetative cloning (Paasch et al., 2015).

Here we utilize restriction site-associated DNA genome sequencing (ddRADseq) to identify the sex of sterile ramets and study the patterns of genetic variation in males and females in two Mohave Desert populations of *S. caninervis*. We found extreme female biased phenotypic sex ratios, consistent with previous studies, but less extreme genetic biases, suggesting that males produce sex structures less frequently than females. We also found lower genetic diversity in males than females, suggesting that the remaining genetic sex ratio bias is best explained by elevated male mortality. Patterns of genet size indicate that sexual dimorphism in growth rate is insufficient to explain the female biased sex ratios in this species.

## MATERIALS AND METHODS

**Sample Collection**— We collected male, female, and sterile *S. caninervis* samples at a low-stress and a high-stress site in the Mojave Desert. The low-stress site is located at an elevation of 1800 m in Sheep Creek Wash near Wrightwood, CA (34° 22' 33.85" N, 117° 36' 34.59" W), at the west edge of the Mojave Desert and the northern base of the San Gabriel Mountains. The average high and low annual temperature is 16.8 °C and 1.7 °C, with an average annual precipitation of 49.4 cm (2007-2011, Wrightwood Weather Station, NOAA National Climatic Data Center). This site experiences little foot traffic. The high-stress site is at an elevation of 1257 m near Phelan, CA (34° 25' 29.80" N, 117° 36' 30.91" W), about nine miles northeast of the low-stress site. The average high and low annual temperature is 27 °C and 10 °C, while average annual precipitation is 28.2 cm

(2005-2009, Phelan, CA, NOAA National Weather Service). This site is also highly disturbed by foot traffic and erosion.

To establish a panel of plants of known sex to use to identify sex-linked molecular markers, we isolated 11 *S. caninervis* female and 10 male ramets from the low stress site in March and April of 2013. Field collections of *S. caninervis* were identified by leaf morphology, color, and hair points then later confirmed with leaf cross-sections. In the laboratory under a dissecting microscope patches were hydrated and screened for presence of current or past antheridia and archegonia.

To estimate the phenotypic sex ratio of the low stress population, in May 2014 we collected in 3-5 cm patches in three parallel 20 m linear north-south (N-S) transects, 10 m apart from one another, collecting one patch every 2 m from a variety of shaded and exposed microhabitats. In June 2014 we made collections from the high stress site in a similar manner in two parallel 20 m N-S transects. Additionally, due to the highly irregular distribution of the species in the high stress site, a third mini-transect was sampled (beginning at about the 23 m mark of transect 2 and extending approximately 2 m), more densely (ca. every 500 cm) selecting samples in a northwest-southeast (NW-SE) direction from a variety of microhabitats. To estimate the genetic sex ratio and perform diversity analyses, a maximum of three individual sterile ramets were isolated from each patch using a dissecting microscope, resulting in a total of 99 ramets from the low stress site and, due to lower frequency of this species at this site, 42 ramets from the high stress site, for a total of  $n = 141$  individual ramets.

***DNA Extraction and RADseq library preparation***— Total genomic DNA was extracted and isolated from 162 total ramets (21 of known sex, and 141 of unknown sex)

using a modified cetyl trimethyl ammonium bromide-beta mercaptoethanol (CTAB) procedure(McDaniel et al., 2007). Prior to extraction, samples were ground dry to a fine powder using a GenoGrinder 2010 bead shaker (SPEX CertiPrep, Metuchen, NJ). DNA quality was evaluated for each sample by electrophoresis and quantified using a Qubit Fluorometer (Invitrogen, Carlsbad, CA, USA) and samples' DNAs were normalized prior to library preparation.

Illumina libraries were prepared for sequencing using a modified version of the Peterson et al. (2012) protocol using the endonucleases EcoRI and MseI (New England Biolabs, Ipswich, MA). Following double enzyme digestion, unique barcoded adaptors were ligated to the resulting EcoRI cutsites and a non barcoded universal adaptor to the MseI cutsite. Variable length barcodes of 8, 9, and 10 basepairs (bp) were used with each barcode, differing by at least 4 bp. Illumina flowcell binding and sequencing primer sites were added to the adaptor ligated fragments through 10 cycles of PCR using NEB Q5 PCR mastermix (New England Biolabs, Ipswich, MA). Success of library construction was evaluated through agarose gel electrophoresis, after which 5  $\mu$ L of each sample's final library was pooled into a single tube for the 141 sterile samples and a separate tube for the 21 samples of known sex. Size selection and sequencing were performed at the University of Florida's Interdisciplinary Center for Biotechnology Research. Pooled libraries were fractionated using Pippin ELF precision electrophoresis (Sage Science, Beverly, MA) with the resulting 250-500 bp fraction being used for Illumina sequencing. The sterile ramet sample library was sequenced using an Illumina NextSeq 500 at mid throughput, producing 150 bp single-end reads. The library consisting of the 21 known-



sex ramets was pooled with libraries constructed in an identical manner for a non-related study and sequenced on one lane of a HiSeq 3000 producing 100 bp single end reads.

**Data analysis**— Raw ddRAD sequence reads were assessed for quality with fastQC (Gordon and Hannon, 2010). All manipulation of raw sequence reads was performed using tools from the FASTX-Toolkit (Gordon and Hannon, 2010) implemented in Galaxy on the University of Florida’s Research Computing Cluster. To eliminate low quality bases at the 3’ end of reads, all sequences were trimmed to 100 bp. Reads were filtered for a minimum Phred quality score of 20 on at least 90% of the read. All reads were then demultiplexed followed by the removal of the 5’ barcode and EcoRI enzyme cutsite.

RAD loci were assembled de novo using STACKS, version 1.24, (Catchen et al., 2011; Catchen et al., 2013). Pertinent parameters for the STACKS pipeline were as follows: a minimum of 2 reads required for each allele within an individual (-m option ustacks), a maximum allowable distance of 2 nucleotides between alleles within a locus (-M option ustacks), a maximum of 2 mismatches allowed when aligning secondary reads to primary stacks (-N option ustacks), and a maximum nucleotide distance of 2 allowed between loci of different individuals (-n option cstacks). A subset of 30 samples, 15 from each site, was used to create the master catalog of loci. Using the STACKS ‘populations’ program, loci containing any SNP categorized as heterozygous for an individual were identified. Since all individuals sampled were haploid gametophytes, all loci were expected to be homozygous; therefore, those loci identified as heterozygous were discarded as they likely represented paralogous or over-merged loci. Sequence data were further filtered to retain only bi-allelic loci with 1 or fewer SNPs, found in a minimum of

74% of samples, with a minor allele frequency lower limit of 0.1, resulting in 2,234 loci used for subsequent genetic analyses.

Twenty-one *S. caninervis* ramets of known sex (11 females expressing archegonia and 10 males expressing antheridia) were used to identify potential sex-associated loci (fragments) that would allow us to infer sex of sterile ramets. Any 80 bp locus that was present in at least five individuals of one sex and absent in all individuals of the opposite sex was considered a potential sex-associated locus. Using these criteria we identified over 1,000 candidate sex-associated loci. From this list, the 100 male-associated and 100 female-associated loci that were present at the highest frequency in each sex (present in 9 of the 10 males and all of the 11 females) were selected for further analyses. A custom Perl script was used to search for these sequences in the alignments from the final 131 sterile ramets used in our analyses (see Results). Of the 200 candidate sex-associated loci, we identified loci that were present in the 131 sterile ramet samples and were in complete linkage with one another. We discarded any loci that were not in complete linkage, because this observation suggested that they were not truly sex-linked, along with any loci that were not recovered in the sterile ramet data set. We counted the number of ramets with only male-associated loci and the number with only female-associated loci and tested for deviations from a 1:1 sex ratio with a Chi-square test and a 2-tailed p-value.

In order to determine the number of unique genotypes among the 131 sterile ramets, clonal assignments were made using genetic distance under the infinite allele model with a pairwise distance threshold of 0 between individuals. Higher mismatch thresholds, up to 8, were evaluated but all resulted in the same clonal assignments. Figure

2 shows the clonal decay distribution of number of unique genets identified at different genetic distance threshold levels. Furthermore, all ramets that were identified as clones of the same genet were also genetically assigned to the same sex. Clonal assignments were used to fill in missing data, when possible, by finding a consensus sequence among ramets per MLG using GENEIOUS version 8.1.4 (Kearse et al., 2012). To test whether the female biased sex ratio was generated by greater female growth rates, we compared the mean number of sites occupied by female and male MLGs, testing for significance using a one-tailed t-test.

To compare levels of genetic variation between the two study populations, and between males and females in the low stress population, we calculated five measures of clonal diversity using the software GENODIVE version 2.0b23 (Meirmans and Van Tienderen, 2004). Clonal diversity ( $P_d$ ) is a measure of unique genets or multi-locus genotypes (MLGs) relative to (divided by) the number of ramets sampled (Ellstrand and Roose, 1987). The effective number of genotypes ( $N_{eff}$ ) is an index that accounts for frequencies of each genet and describes the number of MLGs that have equal frequencies while minimizing low frequency MLGs. This index is analogous to effective number of alleles but instead counts whole MLGs. Clonal evenness (effective number of genotypes divided by number of genotypes) indicates how evenly the MLGs are divided over the population and would be equal to 1.00 if all MLGs were represented equally. We also calculated Simpson's diversity index, corrected for sample size, and the corrected Shannon's index (Chao and Shen, 2003). The latter is a measure of clonal variation that accounts for singletons (genets or MLGs sampled just once) in the population for sample sizes greater than approximately 50 sampling units (Arnaud-Haond et al., 2007). We used

bootstrap tests with 1,000 permutations and subsampling to match population sizes to test for differences in the latter three measures of clonal diversity.

To evaluate the degree to which differences between the two populations could be due to fixed genetic differences, we first calculated the population differentiation statistic  $F_{ST}$  among the 131 sterile ramets from the high and low stress sites using GENODIVE. Next we performed a principal components analysis (PCA) of genetic distance covariation, with the missing data filled in first with clones, where possible, then with the mean allele frequencies of all ramets. The eigenvectors (axis loadings) from the first two PCA axes were plotted with the ggplot2 R package (R Core Team, 2013). We also estimated the population structure using the fastSTRUCTURE (Raj et al., 2014) inference algorithm with a simple logistic prior and  $K = 1$  through  $K = 4$ . The dataset used for this contained 2,234 SNPs from 131 sterile ramets from the high and low stress sites where missing data was filled in with clones, when possible. Membership coefficients for  $K = 2$  were plotted using DISTRUCT version 2.2 from the fastSTRUCTURE software package.

For another means to visualize the patterns of genetic distance among genets in the two populations, we constructed a midpoint-rooted neighbor joining genetic distance tree using CLEARCUT. The dataset used for this contained 2,234 SNPs from 51 genets from the high and low stress sites where missing data were filled in with clones, when possible. Two genets with greater than 80% missing data were excluded. Because the RAD loci are not completely linked, this tree does not represent the genealogical relationships among these individuals but rather genetic similarity.

## RESULTS

**Phenotypic sex ratios**— Of the 49 patches collected in the low stress site, 31 contained no sex structures, 17 contained ramets expressing archegonia and were classified as female, 1 contained ramets of both sexes, and no patches contained ramets with only male gametangia. The resulting phenotypic sex ratio of 18 F:1 M differs significantly from 1:1 meiotic expectations (Chi-squared test, two-tailed p-value < 0.0001).

**Sequencing statistics**—Approximately 150 million total raw sequencing reads were generated for the 141 ramet samples sequenced resulting in roughly 1.06 million reads per barcode. About 40% of the reads were discarded due to low quality, resulting in 88 million reads that passed initial quality filters. Ten ramets with fewer than 4.5 thousand reads were discarded, leaving 98 sterile ramets in the high elevation, low stress site, 33 sterile ramets in the low elevation, high stress site, and 21 ramets of known sex from the low stress site, ranging from 51 thousand to 2.6 million reads per ramet. The data matrix of 2,234 SNPs from 131 sterile ramet samples was 80% complete when using original reads but increased to 94% complete when missing data were filled in with data from identical clonal MLGs. The data matrix of concatenated loci used for the RAxML analysis was 83.3% complete with a mean depth of about 5.6 reads per locus.

**Identifying sex linked loci and genetic sex ratio**— Of the 100 candidate male-associated loci, 63 co-segregated exclusively within 33 sterile ramet samples and were in complete linkage with one another. These 63 loci had an average read depth of 6.3 and on average 33.5 male-associated loci were found within each newly identified male ramet. In parallel, 65 of the 100 candidate female-associated loci co-segregated exclusively in the remaining 98 sterile ramets and were also in complete linkage. These loci had a mean

read depth of 5.7 and an average of 25.3 female-associated loci were detected in each newly identified female ramet. Of the remaining loci, 52 that were found in the test set of 21 ramets of known sex but were absent in the experimental set of 131 sterile ramets. These may have been lost due to subtle differences in the library size selection procedure, or may have been missed due to stochastic sampling. The remaining 20 loci may have been incorrectly categorized as sex-linked, based on the small sample size of the trial set, but it is also possible that some females could have contained fertilized archegonia that went unnoticed during selection of ramets for DNA extraction and, thus, male-associated loci were detected in unobserved embryos (indeed, 13 putative male-associated markers found in sterile females, while 7 putative female-associated markers found in sterile males). Using these putative sex linked markers, we found 65 female ramets and 33 male ramets in samples from the low stress site, equating to an approximate 2:1 female-to-male ratio. This represents a significant deviation from both the 1:1 expectation (Chi-squared test, two-tailed p-value = 0.0012) and from the observed phenotypic sex expression at the patch level (Chi-squared test, two-tailed p-value < 0.0001). Genetic sex ratio on a clonal lineage level in the low stress site was also approximately 2:1 (31 female clonal lineages and 14 male clonal lineages). All 33 of the ramets from the high stress site were found to be female.

***Distribution of genotypic variation***— We found 53 unique MLGs among the 131 sterile ramets, based on analysis of 2,234 biallelic SNPs. The low stress site contained 45 unique MLGs from 98 ramets and the high stress site had eight MLGs from 33 ramets. A total of 53 MLGs were distinguishable at genetic distance thresholds of 0 through 7, after

which the number of MLGs began to drop incrementally without distinct breaks, indicating robust clonal assignments based on the SNP data (Figure 1).

Most unique MLGs in the low stress site were restricted to the 3-5cm patch they were collected from. Of the 45 unique genotypes in the low stress site, three were found within adjacent patches (approximately 2 m apart) and only one MLG extended through three patches for a total of about 4 m (Figure 2). Female and male MLGs did not occupy significantly different numbers of patches (Figure 3A) nor did they contain significantly different numbers of ramets per MLG (Figure 3B).

Both the Simpson's diversity and the corrected Shannon indices were significantly higher in the low stress site than in the high stress site ( $p$ -value = 0.001). Evenness was also slightly greater in the low stress site, but not significantly so (Table 1). The Simpson's diversity and evenness values were not significantly different between the two sexes in the low stress site, but the corrected Shannon Index was significantly higher for females than for males (Table 2,  $p$ -value = 0.001).

***Population differentiation and structure***— The  $F_{ST}$  for the high and low stress sites was 0.102 when all ramets were included. When estimated with just unique genets, however,  $F_{ST}$  dropped to 0.028. The neighbor joining tree recovered genets of the high stress site nested within the low stress site (Figure 5). Population structure analysis in fastSTRUCTURE estimated a minimum of one model component to explain structure in the data. However, this estimate was not supported by the corresponding marginal likelihoods, which increased with the  $K$  parameter with no apparent maximum. Membership coefficients for  $K = 2$ , visualized on Figure 5 show some support for structure among the two sites.

The first axis of the principle components of covariance analysis (PCA) explained 8.112% of the total variation in the 131 ramets and 6.051% was explained by the second axis. A scatterplot of the first two PC axes (Figure 6) shows a tighter clustering of many ramets from the low stress site and lower association of ramets from the high stress site, mostly resolved along PC axis 1. Yet, a few ramets from the high stress site are genetically similar, and therefore clustered near, many in the low stress site.

## DISCUSSION

*S. caninervis* has long been a model for investigations regarding the evolution and ecology of sex ratio variation in mosses (Stark et al., 1998; Stark et al., 2001; Stark et al., 2005a; Stark et al., 2005b; Stark and McLetchie, 2006; Paasch et al., 2015). However, the inferences regarding sex ratio variation in this species, as well as other bryophytes, has been limited by the large number of sterile plants in most bryophyte populations. In principle, this limitation is overcome by the use of sex linked molecular markers, which provide a simple means of determining the sex of sterile plants. Identifying reliable sex-linked markers is not trivial, though, requiring screening large numbers of polymorphic loci in a large pedigree or mapping population. In addition, sex linkage ideally should be confirmed using a physical map, or molecular evolutionary analyses, for example to test for complete linkage disequilibrium (LD) among sex linked loci, as predicted based on the observation that recombination does not occur on UV sex chromosomes (Bachtrog et al., 2011). To date, within mosses this has only been accomplished in the model system *Ceratodon purpureus* (McDaniel et al., 2007; McDaniel et al., 2013). A less rigorous approach involves testing for an association between a molecular marker and sex in a



large panel of unrelated individuals (as has been done in three *Drepanocladus* species; (Bisang et al., 2010; Bisang and Hedenäs, 2013; Bisang et al., 2015; Hedenäs et al., 2016). Here, we have screened several thousand restriction-site associated sequenced (RADseq) loci in a small number of individuals of known sex, but additionally retained only those that exhibited complete LD among all loci in a larger sample. Beyond the large numbers of polymorphisms, RADseq loci have the advantage of being defined by a unique DNA sequence, which both allows us to be confident in the homology of our loci (unlike gel band-length approaches), and ultimately provides a means of identifying sex-linked genes in published transcriptomes (Gao et al., 2014; Wickett et al., 2014).

We use these putative sex-linked markers to show that the genetic sex ratios in two Mojave Desert populations of *S. caninervis* are female biased (2 F:1 M in the low stress site, and entirely female in the high stress site). Importantly, however, the phenotypic sex ratios in this sample were far more biased (17 F:1 M in the low stress site). While it is certainly possible that we have over-estimated the long-term female sex expression rates, due to drought in study area in the years prior to collection (2013-2014), collections from seasons with more typical winter weather patterns reported phenotypic sex ratios of 7 F:1 M (Paasch et al., 2015), approximately three times more female biased than the genetic sex ratio we found. These data indicate that males constitute a disproportionately large fraction of the sterile plants, providing unequivocal support for the shy male hypothesis.

The greater frequency of female ramets, however, indicates that factors beyond thresholds for sex expression must also contribute to the population sex ratio variation in *S. caninervis*. Experimental manipulations show that females regenerate more readily

from plant fragments than males do under both cool conditions and desiccation stress (Stark et al., 2004; Stark et al., 2005b; Stark and McLetchie, 2006), and potentially may exhibit greater clonal propagation. However, the fact that we observed no difference in number of sites occupied between female and male MLGs (Figure 3A) indicates that the genetic female bias in this species is unlikely to be due to faster female growth.

A female genotype bias could also be caused by elevated male mortality. The hypothesis uniquely predicts a lower male haplotype diversity, relative to females, as we found (corrected Shannon index, 1.596 in females, 1.208 in males,  $p = 0.001$ ). Indeed, when comparing the two populations, the high stress site is less clonally diverse (Simpson's and corrected Shannon indices,  $p = 0.001$ ;  $P_d$ , no significance test) and has a greater bias than the low stress site. Importantly, the relatively low  $F_{ST}$  indicates that most surveyed polymorphisms are shared between the two populations, suggesting that the difference between these two populations are unlikely to result from fixed genetic differences between the two populations.

With our current data it is not possible to isolate when in the life cycle male and female demography differ, nor whether it is locally adapted male genotypes that survive or only those genotypes that by chance land in more permissive environmental conditions. However, the association between stress and male mortality suggests that the interaction between male physiology and extrinsic environmental factors are more likely to govern population sex ratio than exclusively intrinsic factors like sex ratio distorters (McDaniel et al., 2007; Norrell et al., 2014). Indeed, the available evidence suggests that *S. caninervis* female biased sex ratios in Mojave Desert populations correlate with precipitation and temperature (this study; Bowker et al., 2000). One potential cause of the

elevated male mortality in *S. caninervis* is differential resource allocation to reproduction. Although sexual reproduction is costly for both sexes, males experience a higher initial cost in the production of antheridia, while fertilized females bear the cost of nurturing a sporophyte (Rydgren et al., 2010). Although we observe sporophytes only rarely in *S. caninervis*, the relatively high diversity evident in our sample, along with the limited population structure and weak structure in the population genealogy all indicate that sexual reproduction is relatively frequent. Thus, males may experience sexual selection to produce more antheridia (McDaniel et al., submitted), although it may be opposed by natural selection which favors investment in the maintenance of vegetative tissues.

Several bryophyte demographic models predict the eventual local extinction of males, based on vegetative growth patterns similar to those found in *S. caninervis* (McLetchie et al., 2001; Crowley et al., 2005; Rydgren et al., 2010), although these models generally assume that migration is negligible. The lack of population structure between our two study sites indicates that population sex ratios may be influenced by migration of male spores from other populations in addition to local population dynamics. The mixing of genotypes in the PCA and distance tree suggests that both sites in Sheeps Creek Wash draw spores from the same metapopulation. Indeed, the overall genetic structure of *S. caninervis* is likely to be governed by low rates of sexual reproduction throughout the whole region – to which the low stress site contributes some spores – and those spores that land where they can grow and reproduce end up contributing to subsequent generations. Other sites, like the high stress site, end up being genotype sinks. These inferences are consistent with phylogeographic studies in other species that report limited population structure even at much larger spatial scales

(McDaniel and Shaw, 2005; Vanderpoorten et al., 2008; Korpelainen et al., 2012; Shaw et al., 2014).

**Conclusions**—This study demonstrates that the highly female-biased sex ratios observed in Mojave Desert *S. caninervis* are congruent with both the shy male hypothesis (Mishler and Oliver, 1991; Stark et al., 2005a) and increased male mortality. These results highlight the importance of environmental conditions and demographic history for shaping sex ratios in this species, and may have important consequences for the persistence of local populations in the presence of long-term shifts in climate. Importantly, both mechanisms are grounded in the disproportionate pre-zygotic energetic cost of sexual reproduction experienced by males relative to females (Mishler and Oliver, 1991; Stark et al., 2000; Stark et al., 2005a). Genomic approaches like those we have used here are likely to shed light on sex ratio variation in other moss species where other processes may predominate (Cronberg, 2003; Bisang and Hedenäs, 2005; Stark et al., 2010; Horsley et al., 2011; Bisang et al., 2014; Norrell et al., 2014). A future challenge is to determine the contributions of migration and environmental factors like water availability, through its effects on determining sex expression and mortality, on the trajectory of population sex ratio change through time.

# LITERATURE CITED

- ARNAUD-HAOND S., C. M. DUARTE, F. ALBERTO, AND E. A. SERRÃO. 2007. Standardizing methods to address clonality in population studies. *Molecular Ecology* 16: 5115-5139.
- BACHTROG D., M. KIRKPATRICK, J. E. MANK, S. F. MCDANIEL, J. C. PIRES, W. R. RICE, AND N. VALENZUELA. 2011. Are all sex chromosomes created equal? *Trends in Genetics* 27: 350-357.
- BISANG I., J. EARLEN, C. PERSSON, AND L. HEDENÄS. 2014. Family affiliation, sex ratio and sporophyte frequency in unisexual mosses. *Botanical Journal of the Linnean Society* 174: 163-172.
- BISANG I., J. EHRLIN, H. KORPELAINEN, AND L. HEDENÄS. 2015. No evidence of sexual niche partitioning in a dioecious moss with rare sexual reproduction. *Annals of Botany* 116: 771-779.
- BISANG I. AND L. HEDENÄS. 2005. Sex ratio patterns in dioicous bryophytes re-visited. *Journal of Bryology* 27: 207-219.
- BISANG I. AND L. HEDENÄS. 2013. Males are not shy in the wetland moss *Drepanocladus lycopodioides*. *International Journal of Plant Sciences* 174: 733-739.
- BISANG I., H. KORPELAINEN, AND L. HEDENÄS. 2010. Can the sex- specific molecular marker of *Drepanocladus trifarius* uncover gender in related species? *Journal of Bryology* 32: 305-308.
- BOWKER M. A., L. R. STARK, D. N. MCLEITCHIE, AND B. D. MISHLER. 2000. Sex expression, skewed sex ratios, and microhabitat distribution in the dioecious desert moss *Syntrichia caninervis* (Pottiaceae). *American Journal of Botany* 87: 517-526.
- CATCHEN J., A. AMORES, P. HOHENLOHE, W. CRESKO, AND J. POSTLETHWAIT. 2011. Stacks: building and genotyping loci de novo from short-read sequences. *G3: Genes, Genomes, Genetics* 1: 171-182.
- CATCHEN J., P. HOHENLOHE, S. BASSHAM, A. AMORES, AND W. CRESKO. 2013. Stacks: an analysis tool set for population genomics. *Molecular Ecology* 22: 3124-3140.
- CHAO A. AND T. SHEN. 2003. Nonparametric estimation of Shannon's index of diversity when there are unseen species in sample. *Environmental and Ecological Statistics* 10: 429-443.
- CRONBERG N. 2003. Clonal distribution, fertility and sex ratios of the moss *Plagiomnium affine* (Bland.) T. Kop. in forests of contrasting age. *Journal of Bryology* 25: 155-162.
- CROWLEY P. H., C. STIEHA, AND D. N. MCLEITCHIE. 2005. Overgrowth competition, fragmentation and sex ratio dynamics: a spatially explicit, sub-individual-based model. *Journal of Theoretical Biology* 233: 25-42.

- 487 ELLSTRAND N. C. AND M. L. ROOSE. 1987. Patterns of genotypic diversity in clonal plant-  
488 species. *American Journal of Botany* 74: 123-131.
- 489 GAO B., D. ZHANG, X. LI, H. YANG, AND A. J. WOOD. 2014. De novo assembly and  
490 characterization of the transcriptome in the desiccation-tolerant moss *Syntrichia caninervis*.  
491 *BMC Research Notes* 7: 1-12.
- 492 GORDON A. AND G. J. HANNON. 2010. Fastx-toolkit.  
493 [http://hannonlab.cshl.edu/fastx\\_toolkit/index](http://hannonlab.cshl.edu/fastx_toolkit/index).
- 494 HEDENÄS L., I. BISANG, H. KORPELAINEN, AND B. CRONHOLM. 2010. The true sex  
495 ratio in European *Pseudocalliergon trifarium* (Bryophyta: Amblystegiaceae) revealed by a  
496 novel molecular approach. *Biological Journal of the Linnean Society* 100: 132-140.
- 497 HEDENÄS L., H. KORPELAINEN, AND I. BISANG. 2016. Identifying sex in non-fertile  
498 individuals of the moss *Drepanocladus turgescens* (Bryophyta: Amblystegiaceae) using a  
499 novel molecular approach. *Journal of Plant Research* 129: 1005-1010.
- 500 HORSLEY K., L. R. STARK, AND D. N. MCLEITCHIE. 2011. Does the silver moss *Bryum*  
501 *argenteum* exhibit sex-specific patterns in vegetative growth rate, asexual fitness or  
502 prezygotic reproductive investment? *Annals of Botany* 107: 897-907.
- 503 KEARSE M., R. MOIR, A. WILSON, S. STONES-HAVAS, M. CHEUNG, S. STURROCK, S.  
504 BUXTON, A. COOPER, S. MARKOWITZ, C. DURAN, T. THIERER, B. ASHTON, P.  
505 MENTJES, AND A. DRUMMOND. 2012. Geneious Basic: an integrated and extendable  
506 desktop software platform for the organization and analysis of sequence data. *Bioinformatics*  
507 28: 1647-1649.
- 508 KORPELAINEN H., I. BISANG, L. HEDENÄS, AND J. KOLEHMAINEN. 2008. The first sex-  
509 specific molecular marker discovered in the moss *Pseudocalliergon trifarium*. *Journal of*  
510 *Heredity* 99: 581-587.
- 511 KORPELAINEN H., A. K. JÄGERBRAND, AND M. VON CRÄUTLEIN. 2012. Genetic  
512 structure of mosses *Pleurozium schreberi* (Willd. ex Brid.) Mitt. and *Racomitrium*  
513 *lanuginosum* (Hedw.) Brid. along altitude gradients in Hokkaido, Japan. *Journal of Bryology*  
514 134: 309-312.
- 515 MCDANIEL S. F., J. ATWOOD, AND J. G. BURLEIGH. 2013. Recurring evolution of dioecy  
516 in bryophytes. *Evolution* 67: 567-572.
- 517 MCDANIEL S. F., S. B. CAREY, C. HENRIQUEZ, A. P. POWELL, G. T. GENNIS, E. Y.  
518 WALKER, K. S. JONES, AND A. C. PAYTON. Sexual selection on male maturation  
519 driven by mating season precipitation. *Evolution*.
- 520 MCDANIEL S. F. AND A. J. SHAW. 2005. Selective sweeps and intercontinental migration in  
521 the cosmopolitan moss *Ceratodon purpureus* (Hedw.) Brid. *Molecular Ecology* 14: 1121-  
522 1132.

- 523 MCDANIEL S. F., J. H. WILLIS, AND A. J. SHAW. 2007. A linkage map reveals a complex  
524 basis for segregation distortion in an interpopulational cross in the moss *Ceratodon*  
525 *purpureus*. *Genetics* 176: 2489-2500.
- 526 MCDANIEL S. F., J. H. WILLIS, AND A. J. SHAW. 2008. The genetic basis of developmental  
527 abnormalities in interpopulation hybrids of the moss *Ceratodon purpureus*. *Genetics Society*  
528 *of America* 1425-1435.
- 529 MCLEITCHIE D. N., G. GARCÍA-RAMOS, AND P. H. CROWLEY. 2001. Local sex-ratio  
530 dynamics: a model for the dioecious liverwort *Marchantia inflexa*. *Evolutionary Ecology* 15:  
531 231-254.
- 532 MEIRMANS P. G. AND P. H. VAN TIENDEREN. 2004. GENOTYPE and GENODIVE: two  
533 programs for the analysis of genetic diversity of asexual organisms. *Molecular Ecology*  
534 *Notes* 4: 792-794.
- 535 MISHLER B. D. AND M. J. OLIVER. 1991. Gametophytic phenology of *Tortula ruralis*, a  
536 desiccation-tolerant moss, in the Organ Mountains of southern New Mexico. *The Bryologist*  
537 94: 143-153.
- 538 NORRELL T. E., K. S. JONES, A. C. PAYTON, AND S. F. MCDANIEL. 2014. Meiotic sex  
539 ratio variation in natural populations of *Ceratodon purpureus* (Ditrichaceae). *American*  
540 *Journal of Botany* 101: 1572-1576.
- 541 PAASCH A. E., B. D. MISHLER, S. NOSRATINIA, L. R. STARK, AND K. M. FISHER. 2015.  
542 Decoupling of sexual reproduction and genetic diversity in the female-biased Mojave Desert  
543 moss *Syntrichia caninervis* (Pottiaceae). *International Journal of Plant Sciences*.
- 544 PETERSON B. K., J. N. WEBER, E. H. KAY, H. S. FISHER, AND H. E. HOEKSTRA. 2012.  
545 Double digest RADseq: An inexpensive method for *de novo* SNP discovery and genotyping  
546 in model and non-model species. *PLOS One* 7.
- 547 R CORE TEAM. 2013. R: A language and environment for statistical computing. Vienna,  
548 Austria.
- 549 RAJ A., M. STEPHENS, AND J. K. PRITCHARD. 2014. fastSTRUCTURE: Variational  
550 Inference of Population Structure in Large SNP Data Sets. *Genetics* 197: 573-589.
- 551 RYDGREN K., R. HALVORSEN, AND N. CRONBERG. 2010. Infrequent sporophyte  
552 production maintains a female-biased sex ratio in the unisexual clonal moss *Hylocomium*  
553 *splendens*. *Journal of Ecology* 98: 1224-1231.
- 554 SHAW A. J. AND S. C. BEER. 1999. Life history variation in gametophyte populations of the  
555 moss *Ceratodon purpureus* (Ditrichaceae). *American Journal of Botany* 86: 512-521.
- 556 SHAW A. J., G. K. GOLINSKI, E. G. CLARK, B. SHAW, H. K. STENØIEN, AND K. I.  
557 FLATBERG. 2014. Intercontinental genetic structure in the amphi-Pacific peatmoss  
558 *Sphagnum miyabeianum* (Bryophyta: Sphagnaceae). *Biological Journal of the Linnean*  
559 *Society* 111: 17-37.



- 560 STARK L. R. 1997. Phenology and reproductive biology of *Syntrichia inermis* (Bryopsida,  
561 Pottiaceae) in the Mojave Desert. *The Bryologist* 100: 13-27.
- 562 STARK L. R., D. N. MCLEITCHIE, AND S. M. EPPLEY. 2010. Sex ratios and the shy male  
563 hypothesis in the moss *Bryum argenteum* (Bryaceae). *The Bryologist* 113: 788-797.
- 564 STARK L. R., D. N. MCLEITCHIE, AND B. D. MISHLER. 2005a. Sex expression, plant size,  
565 and spatial segregation of the sexes across a stress gradient in the desert moss *Syntrichia*  
566 *caninervis*. *American Bryological and Lichenological Society* 108: 183-193.
- 567 STARK L. R. AND D. N. MCLEITCHIE. 2006. Gender-specific heat-shock tolerance of hydrated  
568 leaves in the desert moss *Syntrichia caninervis*. *Physiologia Plantarum* 126: 187-195.
- 569 STARK L. R., N. MCLEITCHIE, AND B. D. MISHLER. 2001. Sex expression and sex  
570 dimorphism in sporophytic populations of the desert moss *Syntrichia caninervis*. *Plant*  
571 *Ecology* 157: 183-196.
- 572 STARK L. R., B. D. MISHLER, AND D. N. MCLEITCHIE. 1998. Sex expression and growth  
573 rates in natural populations of the desert soil crustal moss *Syntrichia caninervis*. *Journal of*  
574 *Arid Environments* 40: 401-416.
- 575 STARK L. R., B. D. MISHLER, AND D. N. MCLEITCHIE. 2000. The cost of realized sexual  
576 reproduction: assessing patterns of reproductive allocation and sporophyte abortion in a  
577 desert moss. *American Journal of Botany* 87: 1599-1608.
- 578 STARK L. R., L. NICHOLS II, D. N. MCLEITCHIE, S. D. SMITH, AND C. ZUNDEL. 2004.  
579 Age and sex-specific rates of leaf regeneration in the Mojave Desert moss *Syntrichia*  
580 *caninervis*. *American Journal of Botany* 91: 1-9.
- 581 STARK L. R., L. I. NICHOLS, D. N. MCLEITCHIE, AND M. L. BONINE. 2005b. Do the sexes  
582 of the desert moss *Syntrichia caninervis* differ in desiccation tolerance? A leaf regeneration  
583 assay. *International Journal of Plant Sciences* 166: 21-29.
- 584 VANDERPOORTEN A., N. DEVOS, B. GOFFINET, O. J. HARDY, AND A. J. SHAW. 2008.  
585 The barriers to oceanic island radiation in bryophytes: insights from the phylogeography of  
586 the moss *Grimmia montana*. *Journal of Biogeography* 35: 654-663.
- 587 WICKETT N. J., S. MIRARAB, N. NGUYEN, T. WARNOW, E. CARPENTER, N. MATASCI,  
588 S. AYYAMPALAYAM, M. S. BARKER, J. G. BURLEIGH, M. A. GITZENDANNER, B.  
589 R. RUHFEL, E. WAFULA, J. P. DER, S. W. GRAHAM, S. MATHEWS, M.  
590 MELKONIAN, D. E. SOLTIS, P. S. SOLTIS, N. W. MILES, C. J. ROTHFELS, L.  
591 POKORNY, A. J. SHAW, L. DEGIRONIMO, D. W. STEVENSON, B. SUREK, J. C.  
592 VILLARREAL, B. ROURE, H. PHILIPPE, C. W. DEPAMPHILIS, T. CHEN, M. K.  
593 DEYHOLOS, R. S. BAUCOM, T. M. KUTCHAN, M. M. AUGUSTIN, J. WANG, Y.  
594 ZHANG, Z. TIAN, Z. YAN, X. WU, X. SUN, G. K. WONG, AND J. LEEBENS-MACK.  
595 2014. Phylotranscriptomic analysis of the origin and early diversification of land plants.  
596 *Proceedings of the National Academy of Sciences* 111: E4859-E4868.

597



# TABLES

| <u>Site</u> | <u>N</u> | <u>G</u> | <u>P<sub>d</sub></u> | <u>N<sub>eff</sub></u> | <u>Simpson's</u> | <u>Evenness</u> | <u>Shannon (corrected)</u> |
|-------------|----------|----------|----------------------|------------------------|------------------|-----------------|----------------------------|
| Low stress  | 98       | 45       | 0.459                | 36.379                 | 0.983*           | 0.808           | 1.753*                     |
| High stress | 33       | 8        | 0.242                | 6.368                  | 0.869*           | 0.796           | 0.874*                     |

Table 1. Clonal diversity indices for high and low stress Sheep Creek Wash sites.

Note: \*Statistical difference between high and low, p-value = 0.001, based on 1,000 permutations with subsampling to match population sizes. N = number of ramets sampled, G = number of genets, P<sub>d</sub> = clonal diversity, N<sub>eff</sub> = effective number of genotypes.

| <u>Sex</u> | <u>N</u> | <u>G</u> | <u>P<sub>d</sub></u> | <u>N<sub>eff</sub></u> | <u>Simpson's</u> | <u>Evenness</u> | <u>Shannon (corrected)</u> |
|------------|----------|----------|----------------------|------------------------|------------------|-----------------|----------------------------|
| Female     | 65       | 31       | 0.477                | 25.000                 | 0.975            | 0.806           | 1.596*                     |
| Male       | 33       | 14       | 0.424                | 11.463                 | 0.941            | 0.819           | 1.208*                     |

Table 2. Clonal diversity indices for the sexes in low stress Sheep Creek Wash site.

Note: \*Statistical difference between the sexes in low stress site, p-value = 0.001, based on 1,000 permutations with subsampling to match population sizes. N = number of ramets sampled, G = number of genets, P<sub>d</sub> = clonal diversity, N<sub>eff</sub> = effective number of genotypes.

# APPENDIX 1

Specimen vouchers were deposited in the California State University, Los Angeles Herbarium (CSLA).

## FIGURE LEGENDS

Figure 1. Clonal lineage decay at different genetic distance thresholds. This figure shows the number of genets that would be identified at each genetic distance parameter setting.

Figure 2. Spatial distribution of genets. The low stress site contained 53 unique genets in 98 ramets from 33 patches along three transects (T1, T2, and T3). Females are represented as circles and males as squares. Genets or multi-locus genotypes (MLGs) are outlined in dashed lines. In cases that genets are in different patches, a dashed line connects different ramets of the same MLG.

Figure 3. Number of patches occupied by (A) and (B) number of ramets per male and female MLG. The average number of patches occupied by and the number of ramets male and female MLGs in the Sheep Creek Wash low stress site do not differ significantly. Error bars are standard deviation.

Figure 4. Proportion of genets with 1-5 ramets in the high and low stress sites. Proportion of each vertical bar represents proportion of total genets or multi-locus genotypes (MLGs) that were represented by each number of ramets.

636

637 Figure 5. fastSTRUCTURE membership coefficients for  $K = 2$ . Vertical bars represents  
638 an individual ramets while colors represent genetic clusters detected ( $K = 2$ ). Bars on the  
639 left represent ramets from the high stress site ( $n = 33$ ) and bars on the right represent  
640 ramets from the low stress site ( $n = 98$ ). Membership coefficients are plotted for each  
641 ramet and colored corresponding to the proportion of its MLG that most closely aligns  
642 each of the two clusters. The dataset used for this contained 2,234 SNPs from 131 sterile  
643 ramets from the high and low stress sites where missing data was filled in with clones,  
644 when possible.

645

646 Figure 6. CLEARCUT neighbor joining genetic distance tree of ramets from the low and  
647 the high stress site of Sheep Creek. Branches that lead to the low stress ('L') site are blue  
648 and those that lead to the high stress site ('H') are red. Branches that lead to mixed-  
649 population groups are purple. Symbols indicate inferred sex.

650

651 Figure 7. Genetic distance PCA of all MLGs in the high and low stress sites Sheep Creek  
652 Wash. Ramets from the high stress site are red and from the low stress site are blue.  
653 Males are indicated with triangles and females with circles, and shape size is scaled to the  
654 number of ramets sharing the same MLG ('Clones'). Missing alleles were filled in first  
655 with clones, when possible, then with the mean allele frequencies of all ramets. PC1  
656 explains 8.112% of the total variation in the samples and 6.051% is explained by PC2  
657 (Cumulative 14.164%).

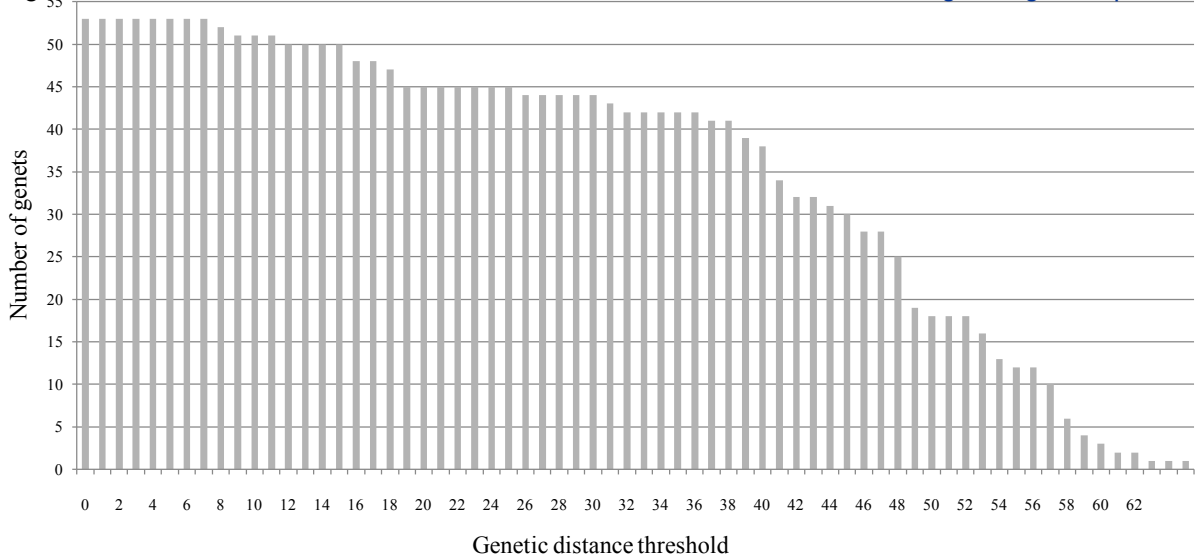

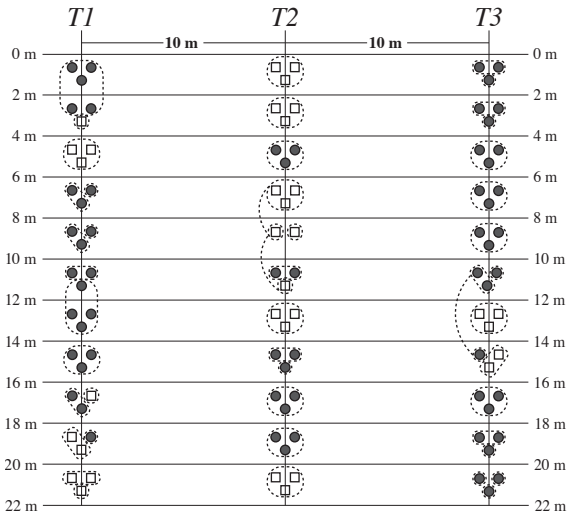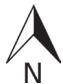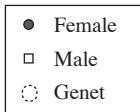

**Figure 3**

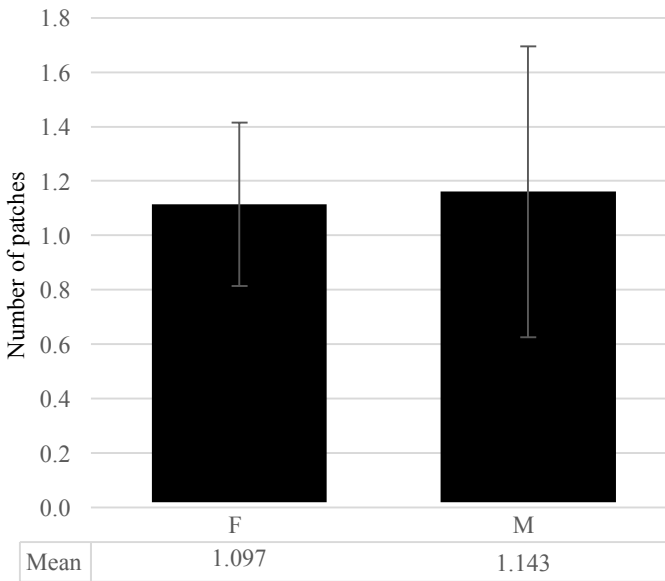

**B** [Click here to download Figure Figure\\_3.pdf](#)

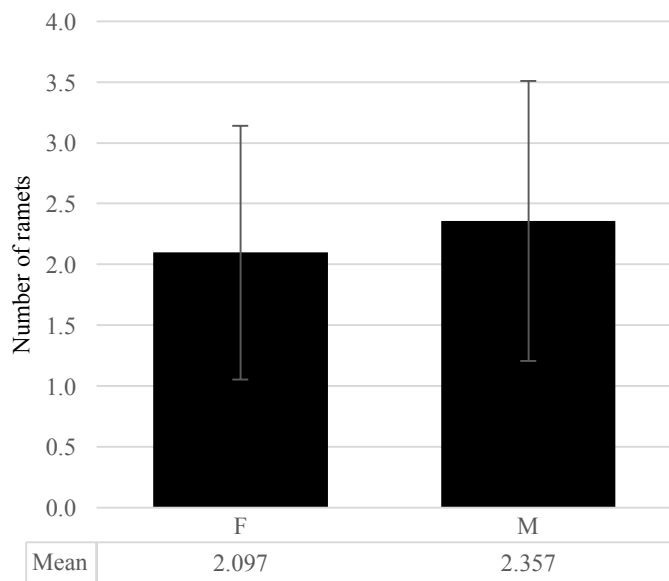

Figure 4

[Click here to download Figure\\_Figure\\_4.pdf](#)

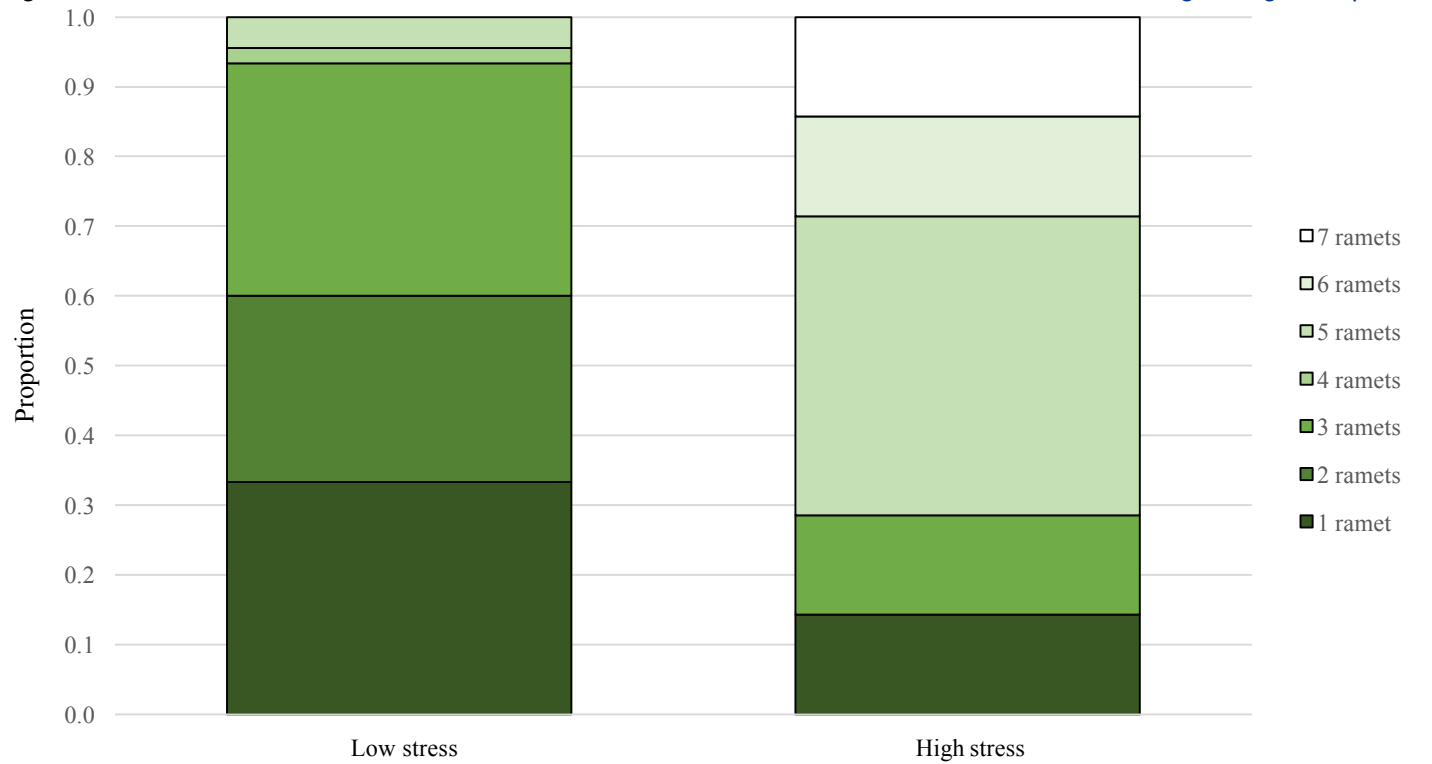





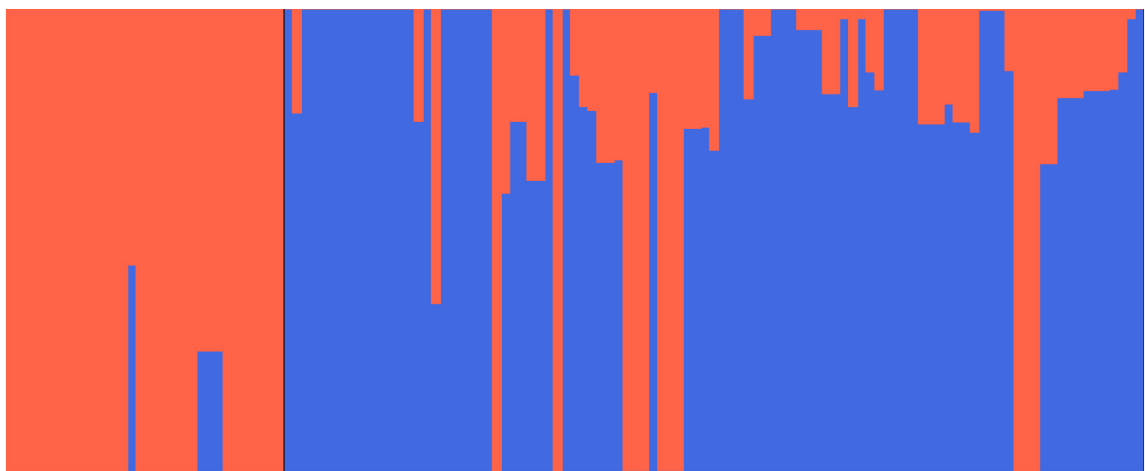

High stress

Low stress

Figure 6

[Click here to download Figure Figure\\_6.pdf](#)

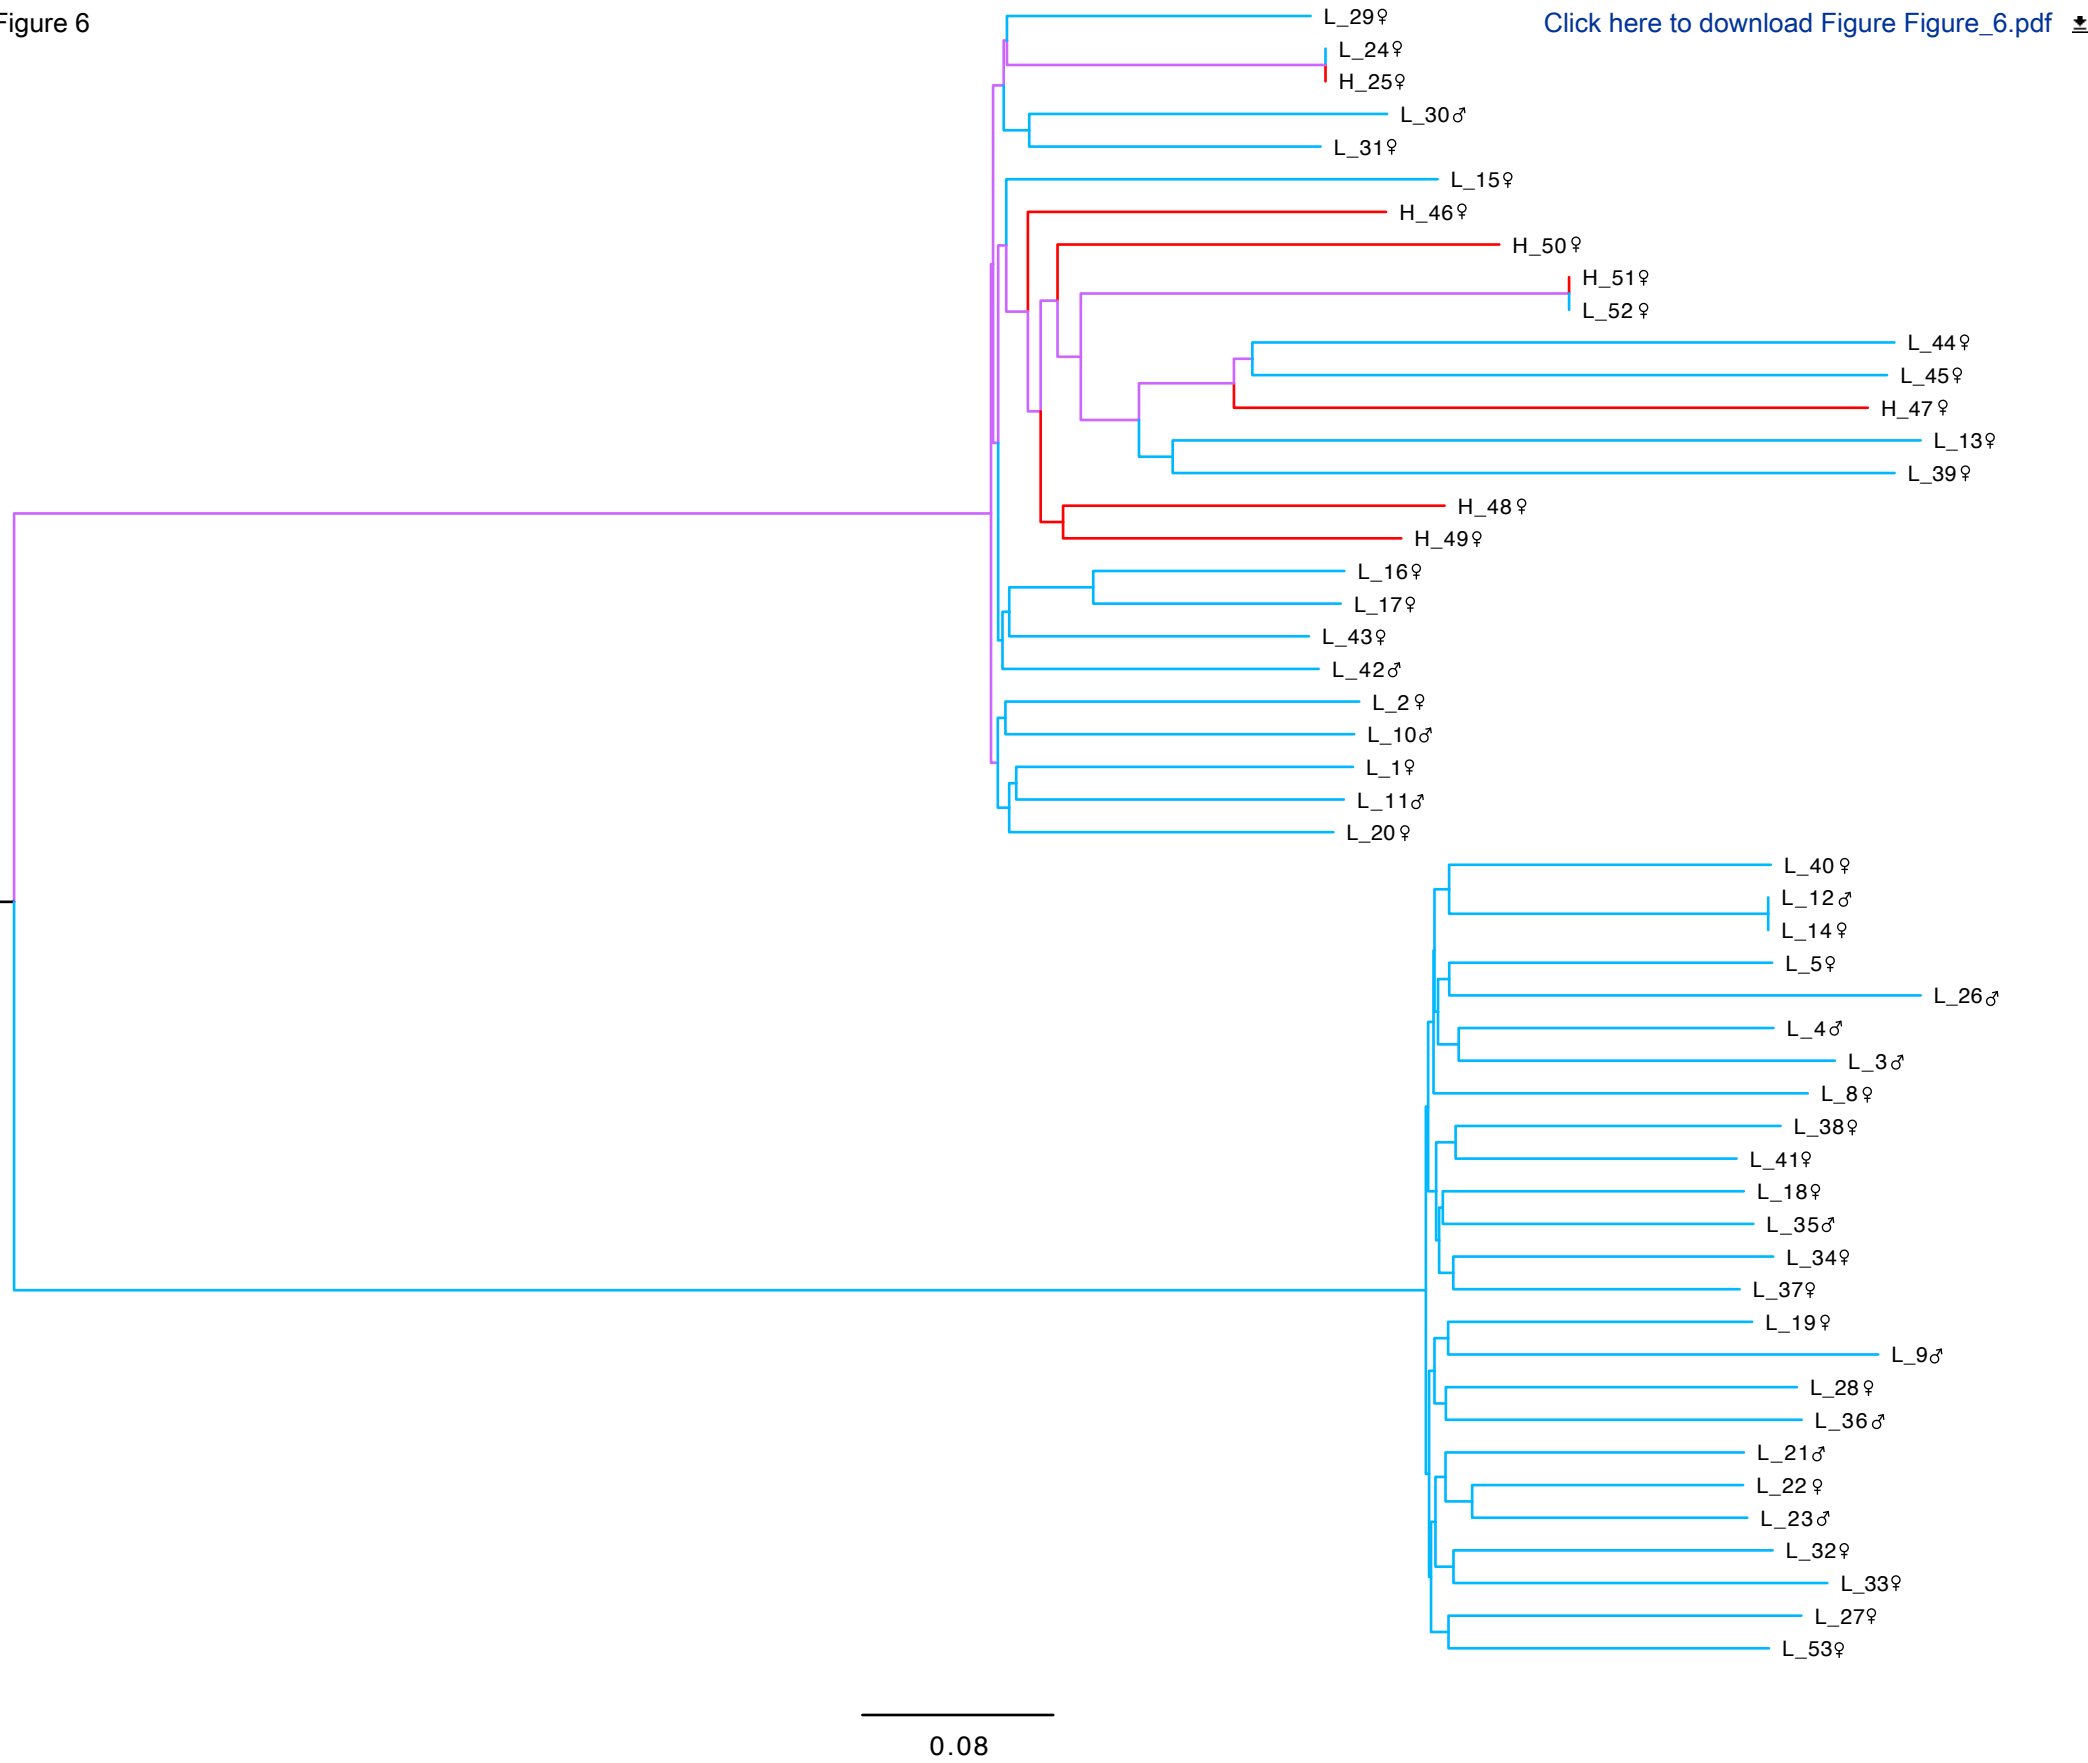

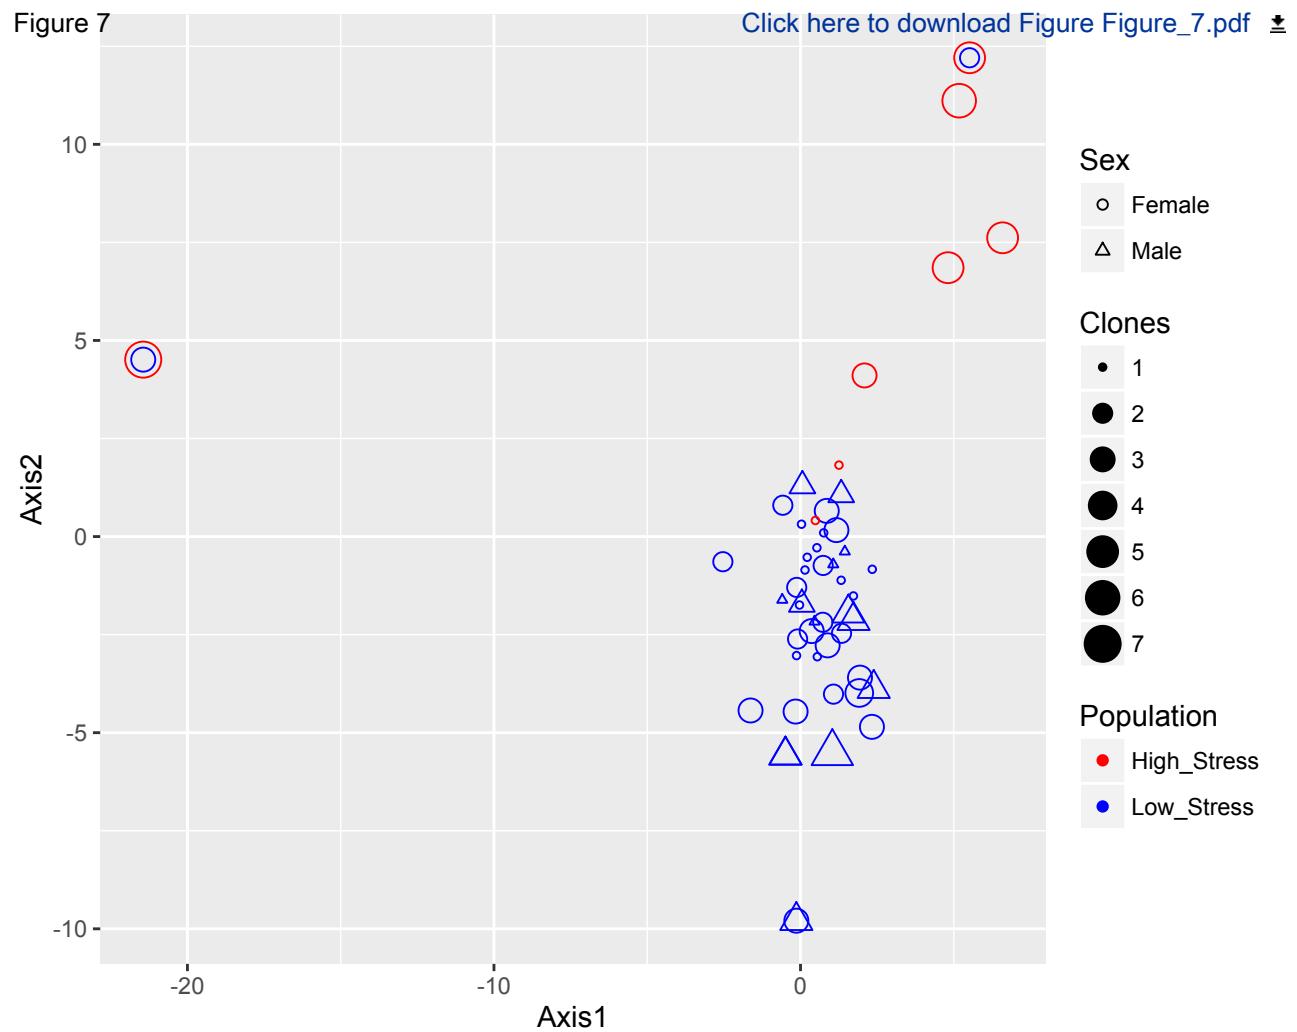

Source: http://biorxiv.org/content/10.1101/075861v1.full.pdf
